# Supplementary material for: Tributyltin Inhibits Neural Induction of Human Induced Pluripotent Stem Cells
Source: PubMed Central journal article supplement (PMC6092327; doi:10.1038/s41598-018-30615-2), 2018-08-14
Supplement: 41598_2018_30615_MOESM1_ESM.pdf [file 41598_2018_30615_MOESM1_ESM.pdf]

## **Supplementary Information**

### **Tributyltin Inhibits Neural Induction of Human Induced Pluripotent Stem Cells**

Shigeru Yamada<sup>1,2</sup>, Yusuke Kubo<sup>1</sup>, Daiju Yamazaki<sup>1</sup>, Yuko Sekino<sup>1</sup>, Yoko Nomura<sup>3</sup>,  
Sachiko Yoshida<sup>4</sup>, and Yasunari Kanda<sup>1,\*</sup>

<sup>1</sup>Division of Pharmacology, National Institute of Health Sciences, Kanagawa, Japan,

<sup>2</sup>Pharmacological Evaluation Institute of Japan (PEIJ), Kanagawa, Japan, <sup>3</sup>Department  
of Psychology, Queens College and The Graduate Center, New York, USA,

<sup>4</sup>Department of Environmental and Life Sciences, Toyohashi University of Technology,  
Toyohashi, Japan

\*Correspondence and requests for materials should be addressed to Y.Ka.

([kanda@nihs.go.jp](mailto:kanda@nihs.go.jp))

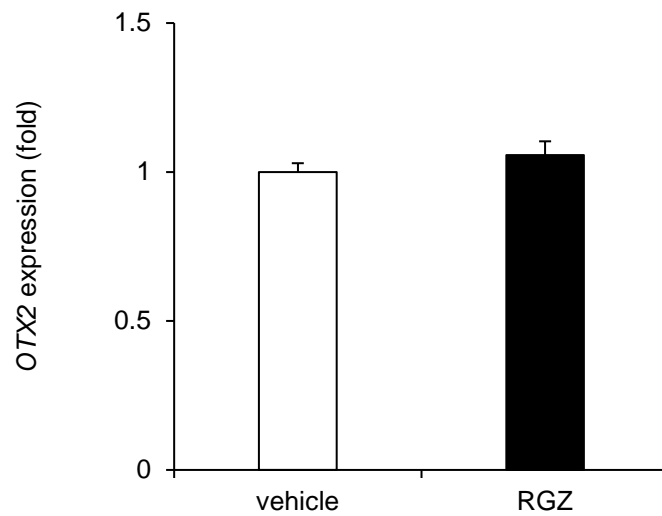

**Figure S1. RGZ has a little effect on ectoderm induction of iPSCs.** Ectoderm induction was initiated after exposure to 100 nM RGZ for 24 h. The cells were continuously exposed to RGZ throughout the induction. At day 2 after the induction with RGZ, *OTX2* expression was examined using real-time PCR analysis. Data are represented as means  $\pm$  SD (n = 3).

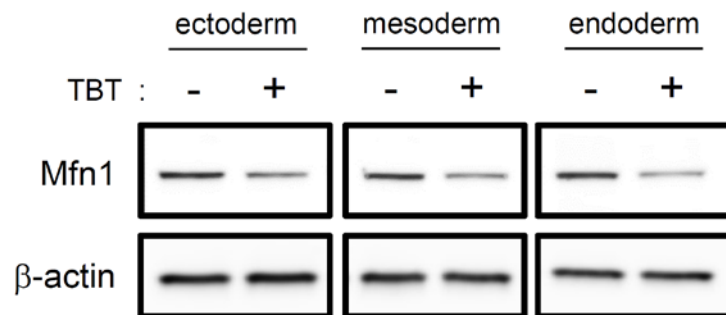

**Figure S2. TBT negatively regulates Mfn1 expression.** After the differentiation of iPSCs into three germ layers with TBT, the expression of Mfn1 was analyzed by western blotting using anti-Mfn1 antibodies.  $\beta$ -actin was used as loading control. Cropped blots were shown and the full-length blots were indicated in Supplementary Fig. 3.

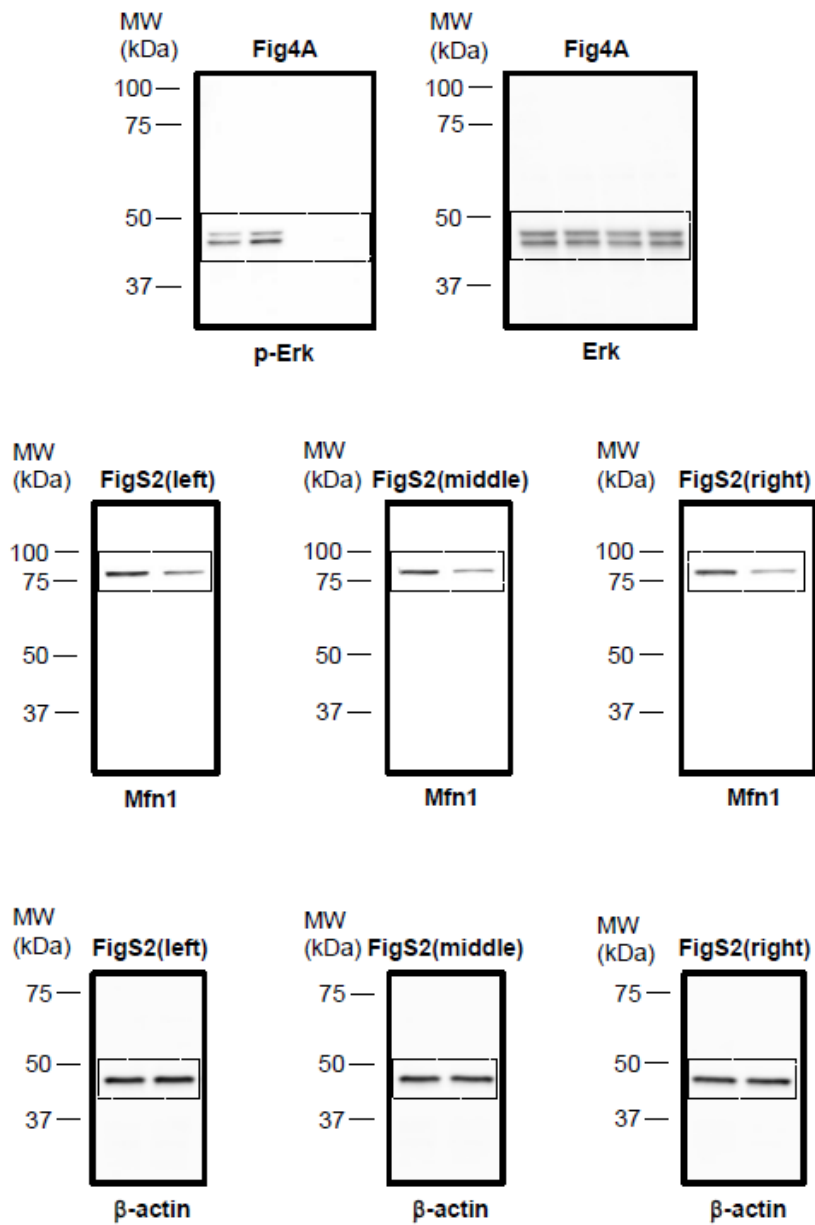

**Figure S3. Images of full length blots.** Dotted lines indicate cropped images used in the figures.
